# Supplementary material for: Motivation to stop smoking in the German population between 2016 - 2021 and associated factors: results from a repeated cross-sectional representative population survey (German Study on Tobacco Use, DEBRA study)
Source: HighWire-hosted journal article supplement (doi:10.1136/bmjopen-2022-068198), 2023-05-01
Supplement: bmjopen-2022-068198supp001_data_supplement.pdf [file bmjopen-2022-068198supp001_data_supplement.pdf]

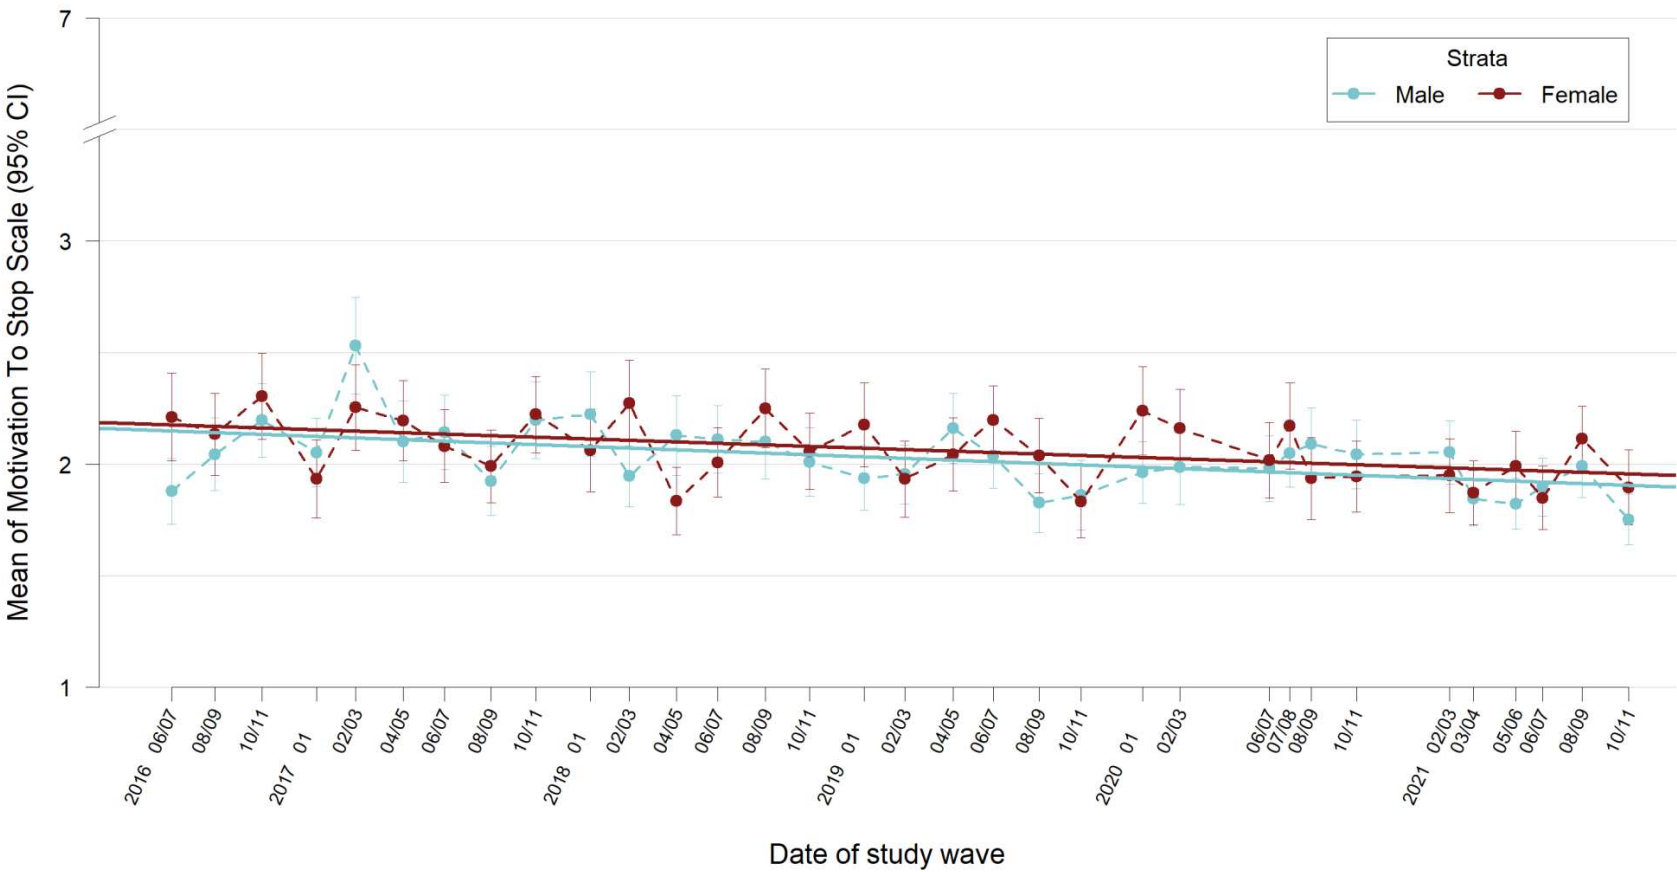

**Online supplemental figure 1A - Trend of motivation to stop smoking among adult tobacco smokers in Germany stratified by gender (weighted data, n=18,299)**

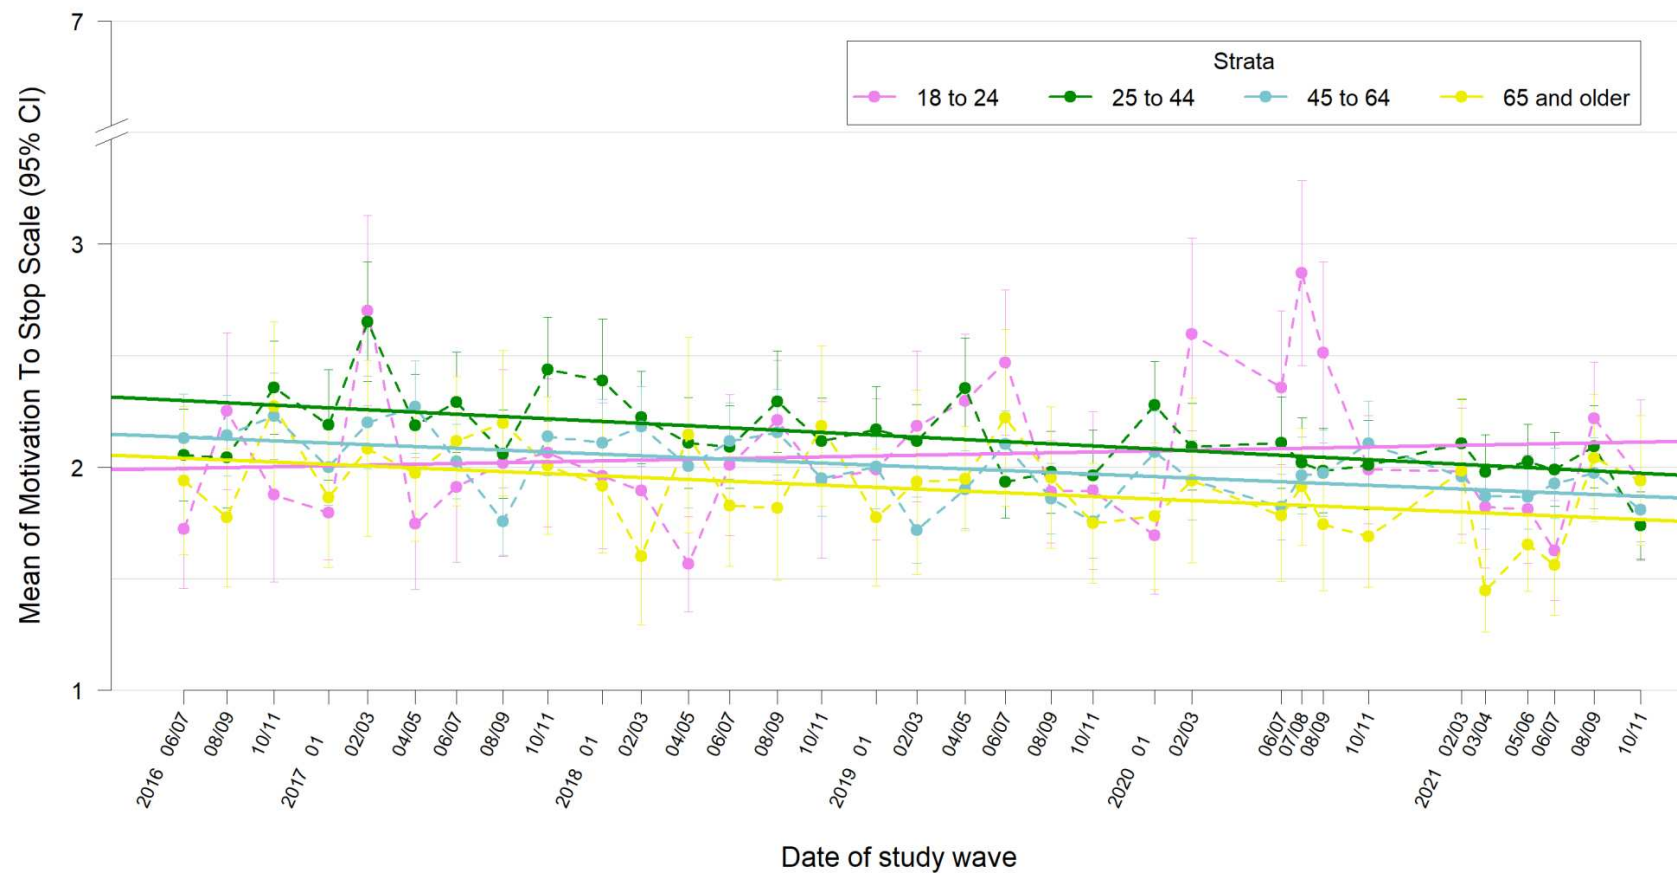

Online supplemental figure 1B - Trend of motivation to stop smoking among adult tobacco smokers in Germany stratified by age (weighted data, n=18,303)

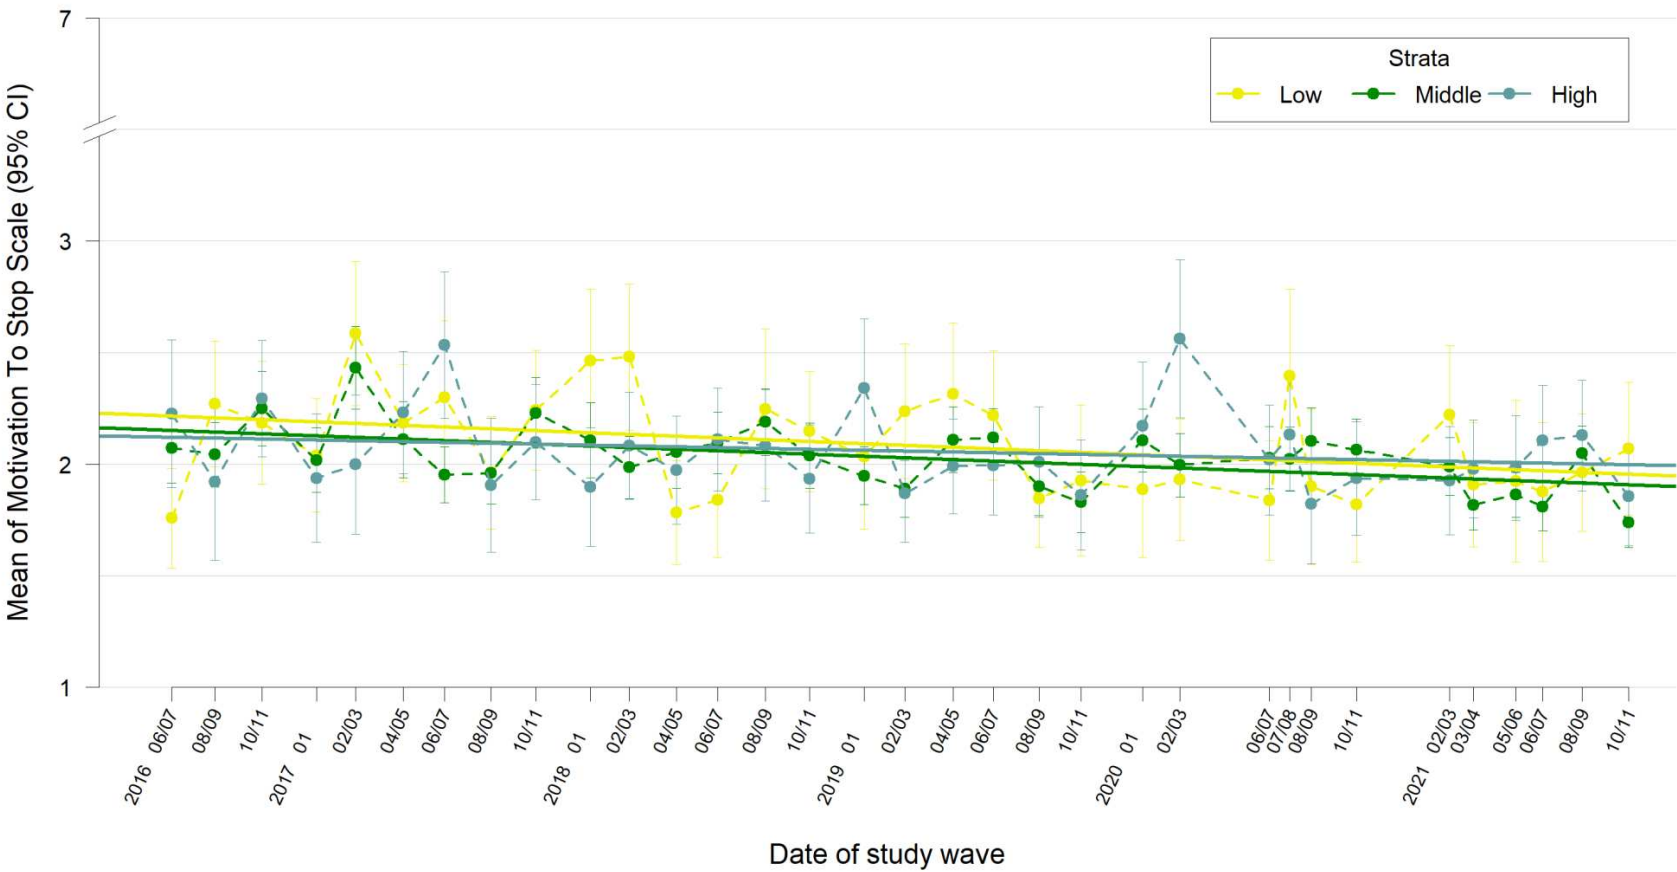

Online supplemental figure 1C - Trend of motivation to stop smoking among adult tobacco smokers in Germany stratified by level of income (weighted data, n=18,290)

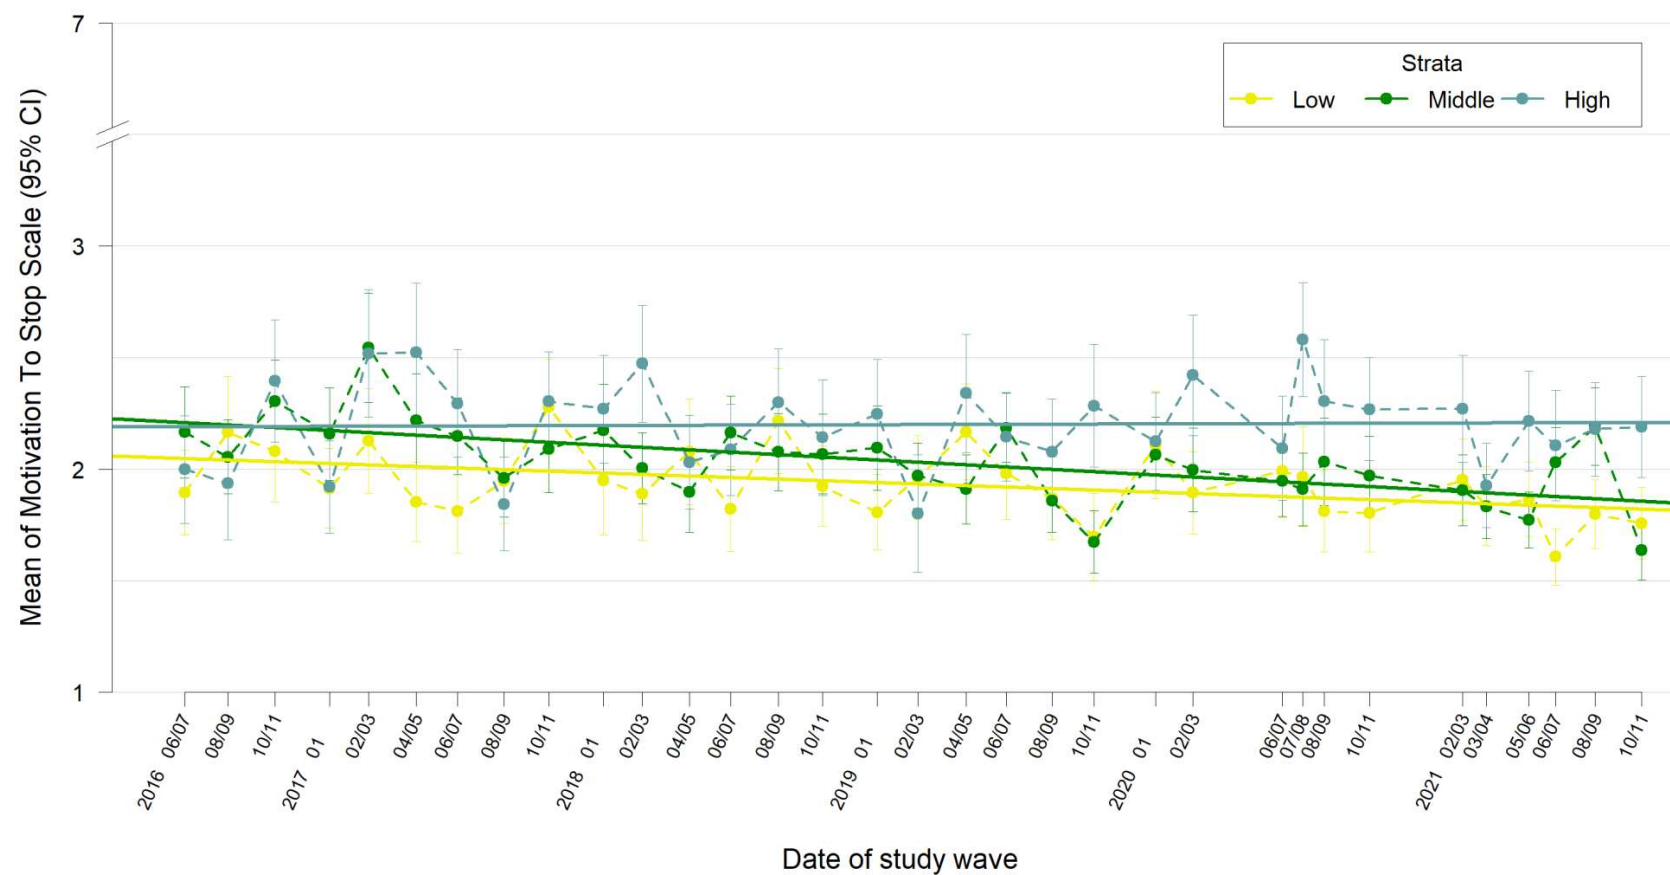

Online supplemental figure 1D - Trend of motivation to stop smoking among adult tobacco smokers in Germany stratified by level of education (weighted data, n=18,039)

For online supplemental figures 1A to 1D: The markers on the x-axis present the accurate mean date of each study wave. Trend lines (linear regression) presented as solid lines. Due to lockdowns caused by the COVID-19 pandemic, no surveys waves could take place in April/May 2020 and January 2021.

## Analysis for adolescent tobacco smokers

**Methods:** The regression analysis as well as the description of trends were repeated for respondents aged 14 to 17 (inclusive). Both were initially planned to be identical to the analysis of adult tobacco smokers. Due to a smaller sample size ( $n=177$  for waves 1 to 33) and incomplete data in some variables, we had to modify our planned regression model (see study protocol <https://osf.io/qn6ts/>) to a more parsimonious one and reduce the amount of stratification for the description of trends. Therefore, we excluded the variables level of education (73%/ $n=134$  missing values) and number of cigarettes per day (8%/ $n=14$  missing values), which had the most missing data, in the regression analysis as well as refrained from a subsample analysis including HTP and waterpipe use (data from wave 13 onwards,  $n=116$ ) and a sensitivity analysis with imputed data. The description of trends were presented by study year and limited to all adolescent smokers combined and stratification by gender only.

**Results:** In adolescent tobacco smokers, at least one quit attempt 0-6 months ago vs. no quit attempt in the past 12 months was associated with a higher motivation to stop smoking ( $OR_{adj}=6.10$ ; 95%CI 2.54-14.68). No other statistical significant associations were among the outcomes (see online supplemental table 2).

Online supplemental figures 2 and 3 present the trend of motivation to stop smoking in adolescents.

**Online supplemental table 1 – Sample characteristics in total and by level of motivation to stop smoking (all adolescent tobacco smokers<sup>a</sup>, unweighted data)**

|                                           | All smokers<br>(n = 182 <sup>b</sup> ) | MTSS<br>Level 1<br>(n = 79) | MTSS<br>Level 2<br>(n = 41) | MTSS<br>Level 3<br>(n = 24) | MTSS<br>Level 4<br>(n = 11) | MTSS<br>Level 5<br>(n = 16) | MTSS<br>Level 6<br>(n = 1) | MTSS<br>Level 7<br>(n = 5) |
|-------------------------------------------|----------------------------------------|-----------------------------|-----------------------------|-----------------------------|-----------------------------|-----------------------------|----------------------------|----------------------------|
| Age in years, mean (SD)                   | 16.2 (0.9)                             | 16.4 (0.8)                  | 16.0 (0.9)                  | 16.4 (1.0)                  | 16.4 (1.1)                  | 16.1 (0.9)                  | 15.0 (0.0)                 | 15.6 (1.1)                 |
| Gender                                    |                                        |                             |                             |                             |                             |                             |                            |                            |
| Men                                       | 54.4 (99)                              | 58.2 (46)                   | 43.9 (18)                   | 50.0 (12)                   | 81.8 (9)                    | 56.3 (9)                    | 0.0 (0)                    | 40.0 (2)                   |
| Women                                     | 45.6 (83)                              | 41.8 (33)                   | 56.1 (23)                   | 50.0 (12)                   | 18.2 (2)                    | 43.8 (7)                    | 100.0 (1)                  | 60.0 (3)                   |
| Level of education                        |                                        |                             |                             |                             |                             |                             |                            |                            |
| Low                                       | 39.6 (19)                              | 45.5 (10)                   | 40.0 (4)                    | 37.5 (3)                    | 0.0 (0)                     | 25.0 (1)                    | 0.0 (0)                    | 0.0 (0)                    |
| Middle                                    | 54.2 (26)                              | 54.5 (12)                   | 60.0 (6)                    | 50.0 (4)                    | 100.0 (3)                   | 25.0 (1)                    | 0.0 (0)                    | 0.0 (0)                    |
| High                                      | 6.3 (3)                                | 0.0 (0)                     | 0.0 (0)                     | 12.5 (1)                    | 0.0 (0)                     | 50.0 (2)                    | 0.0 (0)                    | 0.0 (0)                    |
| Income <sup>d</sup> , mean (SD)           | 0.9 (0.7)                              | 0.8 (0.6)                   | 0.9 (0.7)                   | 1.1 (0.8)                   | 1.1 (1.0)                   | 1.0 (0.4)                   | 1.0 (0.0)                  | 1.1 (1.1)                  |
| Number of cigarettes per day, mean (SD)   | 7.1 (6.4)                              | 7.9 (6.6)                   | 5.7 (6.0)                   | 7.6 (7.3)                   | 6.1 (5.9)                   | 8.2 (6.3)                   | 10.0 (0.0)                 | 3.6 (4.7)                  |
| Recent quit attempts                      |                                        |                             |                             |                             |                             |                             |                            |                            |
| No attempt in the past 12 months          | 81.7 (138)                             | 88.3 (68)                   | 88.9 (32)                   | 77.3 (17)                   | 54.5 (6)                    | 60.0 (9)                    | 100.0 (1)                  | 60.0 (3)                   |
| At least one attempt 7-12 months ago      | 4.1 (7)                                | 6.5 (5)                     | 0.0 (0)                     | 0.0 (0)                     | 9.1 (1)                     | 6.7 (1)                     | 0.0 (0)                    | 0.0 (0)                    |
| At least one attempt 0-6 months ago       | 14.2 (24)                              | 5.2 (4)                     | 11.1 (4)                    | 22.7 (5)                    | 36.4 (4)                    | 33.3 (5)                    | 0.0 (0)                    | 40.0 (2)                   |
| Time spent with urges to smoke, mean (SD) | 2.6 (1.1)                              | 2.7 (1.2)                   | 2.6 (0.9)                   | 2.6 (0.9)                   | 2.4 (1.1)                   | 2.7 (0.9)                   | 3.0 (0.0)                  | 2.0 (1.4)                  |
| Strength of urges to smoke, mean (SD)     | 1.4 (1.0)                              | 1.4 (1.1)                   | 1.5 (0.8)                   | 1.5 (0.9)                   | 1.4 (1.0)                   | 1.4 (0.7)                   | 2.0 (0.0)                  | 1.2 (1.8)                  |
| Use of e-cigarettes                       |                                        |                             |                             |                             |                             |                             |                            |                            |
| Never                                     | 50.0 (91)                              | 53.2 (42)                   | 46.3 (19)                   | 37.5 (9)                    | 54.5 (6)                    | 56.3 (9)                    | 0 (0)                      | 60.0 (3)                   |
| Ex-experimental                           | 29.7 (54)                              | 27.8 (22)                   | 24.4 (10)                   | 37.5 (9)                    | 18.2 (2)                    | 37.5 (6)                    | 100.0 (1)                  | 40.0 (2)                   |

|                               |            |           |           |           |          |          |         |          |
|-------------------------------|------------|-----------|-----------|-----------|----------|----------|---------|----------|
| Ex-regular                    | 7.7 (14)   | 7.6 (6)   | 9.8 (4)   | 16.7 (4)  | 0.0 (0)  | 0.0 (0)  | 0.0 (0) | 0.0 (0)  |
| Current                       | 12.6 (23)  | 11.4 (9)  | 19.5 (8)  | 8.3 (2)   | 27.3 (3) | 6.3 (1)  | 0.0 (0) | 0.0 (0)  |
| Use of HTP <sup>c</sup>       |            |           |           |           |          |          |         |          |
| Never                         | 84.0 (100) | 88.2 (45) | 86.7 (26) | 64.7 (11) | 83.3 (5) | 85.7 (6) | 0.0 (0) | 100 (5)  |
| Ex-experimental               | 14.3 (17)  | 11.8 (6)  | 13.3 (4)  | 29.4 (5)  | 0.0 (0)  | 14.3 (1) | 0.0 (0) | 0.0 (0)  |
| Ex-regular                    | 0.8 (1)    | 0.0 (0)   | 0.0 (0)   | 5.9 (1)   | 0.0 (0)  | 0.0 (0)  | 0.0 (0) | 0.0 (0)  |
| Current                       | 0.8 (1)    | 0.0 (0)   | 0.0 (0)   | 0.0 (0)   | 16.7 (1) | 0.0 (0)  | 0.0 (0) | 0.0 (0)  |
| Use of waterpipe <sup>c</sup> |            |           |           |           |          |          |         |          |
| Never                         | 47.9 (57)  | 51.0 (26) | 46.7 (14) | 47.1 (8)  | 66.7 (4) | 28.6 (2) | 0.0 (0) | 40.0 (2) |
| Ex-experimental               | 21.0 (25)  | 25.5 (13) | 16.7 (5)  | 11.8 (2)  | 16.7 (1) | 28.6 (2) | 0.0 (0) | 20.0 (1) |
| Ex-regular                    | 5.0 (6)    | 3.9 (2)   | 3.3 (1)   | 11.8 (2)  | 0.0 (0)  | 0.0 (0)  | 0.0 (0) | 0.0 (0)  |
| Current                       | 26.1 (31)  | 19.6 (10) | 33.3 (10) | 29.4 (5)  | 16.7 (1) | 42.9 (3) | 0.0 (0) | 40.0 (2) |

Numbers present percentage (number), unless otherwise stated

<sup>a</sup> Data from DEBRA waves 1 to 33, except for use of HTP and waterpipe, for which only data from waves 13 to 33 were used

<sup>b</sup> 2.7 % (n=5) had missing data for the MTSS

<sup>c</sup> 119 adolescent tobacco smokers included from waves 13 to 33 of whom 2.5% (n=3) had missing data for the MTSS, column sums differ accordingly

<sup>d</sup> Range from 0 (0 Euro income) to 7 (7,000 or more Euro income)

DEBRA, German Study on Tobacco Use; HTP, heated tobacco products, MTSS, Motivation To Stop Scale



**Online supplemental table 2 – Multivariable ordinal regression model of associations with level of motivation to stop smoking among current adolescent tobacco smokers in Germany (unweighted data)**

|                                        | Higher rating on the MTSS (1-7)<br>Full sample analysis**<br>(wave 1-33, n = 165) <sup>a</sup><br>OR <sub>adj</sub> [95% CI] <sup>*</sup> |
|----------------------------------------|-------------------------------------------------------------------------------------------------------------------------------------------|
| Age (per 1 year)                       | 0.73 [0.52-1.03]                                                                                                                          |
| Gender                                 |                                                                                                                                           |
| Men (ref)                              | 1.00                                                                                                                                      |
| Women                                  | 1.25 [0.69-2.27]                                                                                                                          |
| Income <sup>b</sup>                    | 1.34 [0.86-2.08]                                                                                                                          |
| Recent quit attempts                   |                                                                                                                                           |
| No attempt in the past 12 months (ref) | 1.00                                                                                                                                      |
| At least one attempt 7-12 months ago   | 0.70 [0.13-3.62]                                                                                                                          |
| At least one attempt 0-6 months ago    | 6.10 [2.54-14.68]                                                                                                                         |
| Time spent with urges to smoke         | 0.79 [0.49-1.28]                                                                                                                          |
| Strength of urges to smoke             | 1.01 [0.60-1.68]                                                                                                                          |
| Use of e-cigarettes                    |                                                                                                                                           |
| Never (ref)                            | 1.00                                                                                                                                      |
| Ex-experimental                        | 1.08 [0.54-2.16]                                                                                                                          |
| Ex-regular                             | 0.85 [0.27-2.65]                                                                                                                          |
| Current                                | 0.77 [0.30-2.01]                                                                                                                          |

\* Odds ratio of a higher level on the MTSS (1-7) for a one-unit increase in a continuous predictor or change in level for a categorical predictor

\*\* Year of the survey added as a design factor

<sup>a</sup> 7.2% (n=12) of cases had to be excluded due to missing data in at least one independent variable

<sup>b</sup> Range from 0 (0 Euro income) to 7 (7,000 or more Euro income)

MTSS, Motivation To Stop Scale

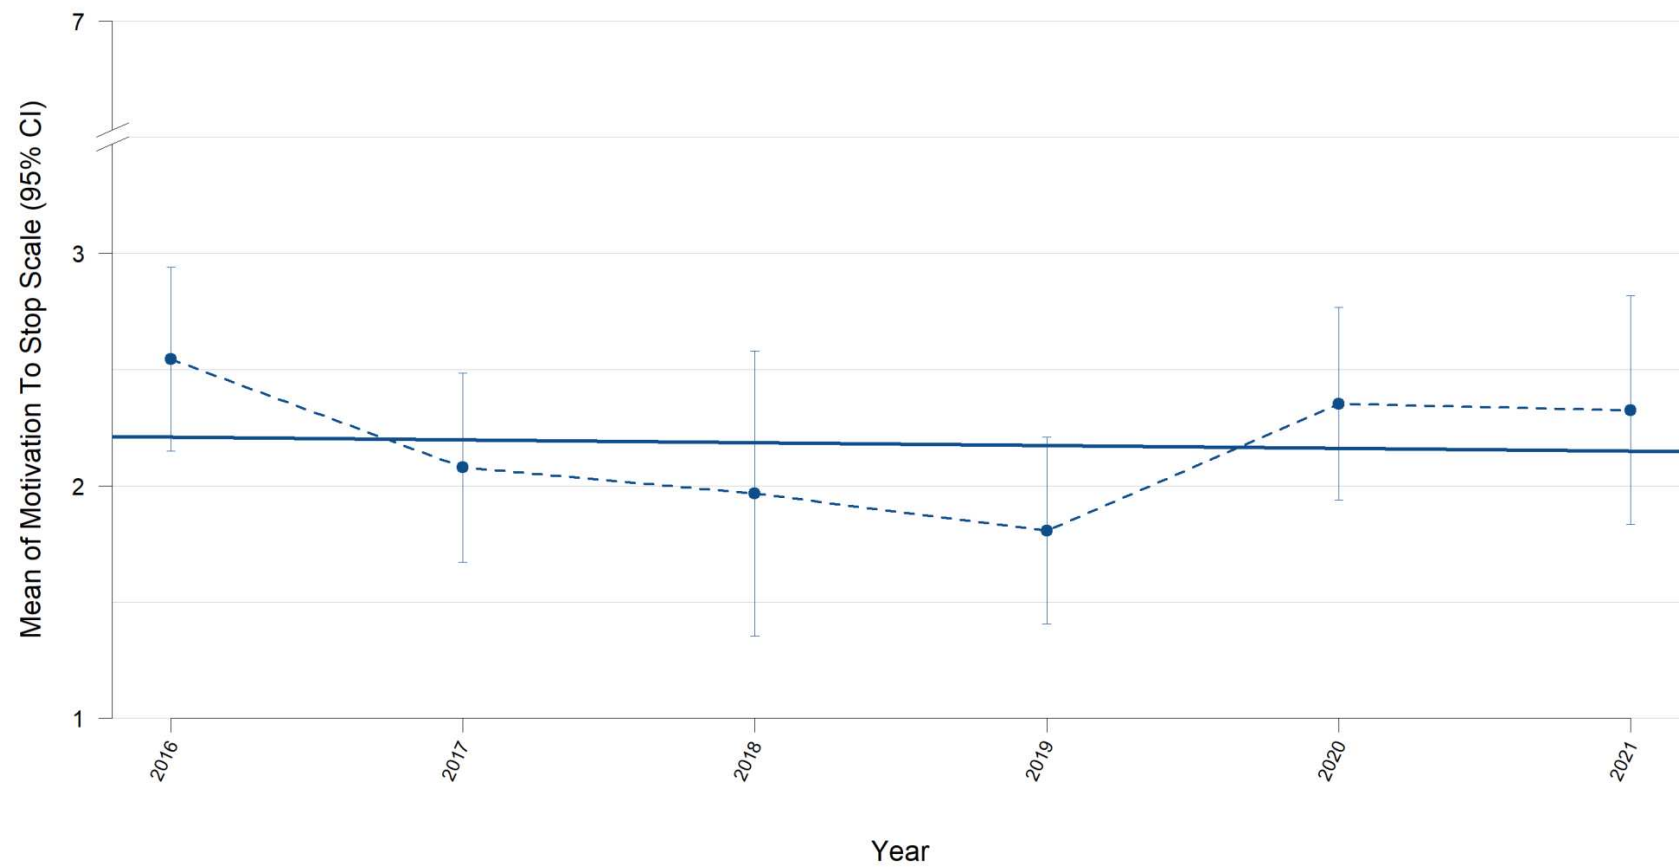

**Online supplemental figure 2 - Trend of motivation to stop smoking among adolescent tobacco smokers in Germany (weighted data, n=228).** Trend line (linear regression) presented as solid line.

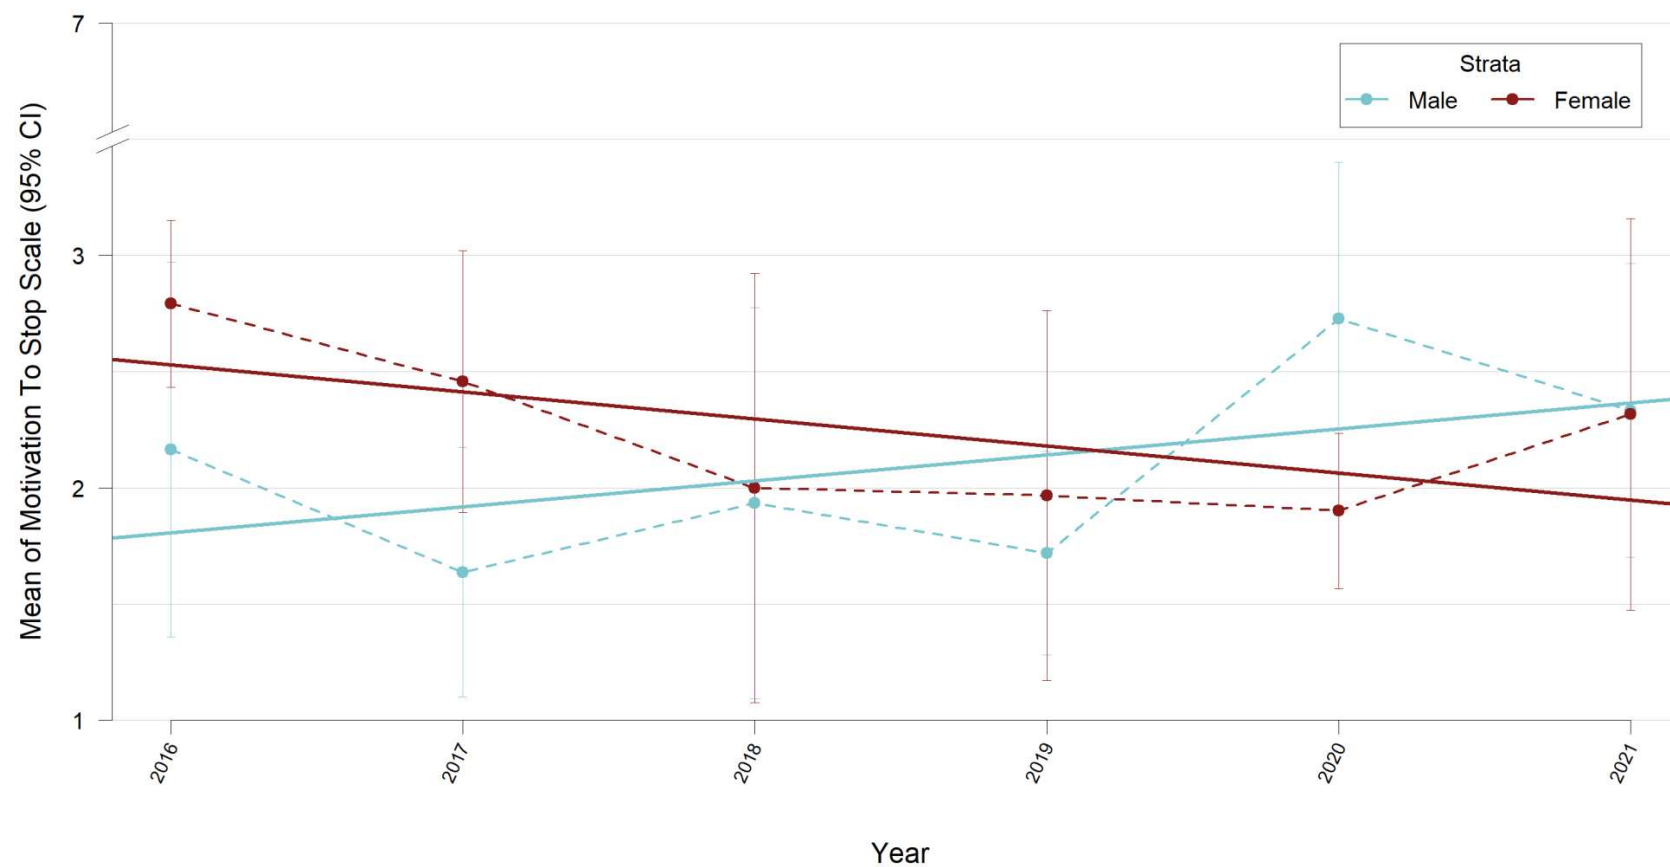

**Online supplemental figure 3 - Trend of motivation to stop smoking among adolescent tobacco smokers in Germany stratified by gender (weighted data, n=228).** Trend lines (linear regression) presented as solid lines.
